# Supplementary material for: USP11 deubiquitinates RAE1 and plays a key role in bipolar spindle formation
Source: PubMed Central journal article supplement (PMC5749825; doi:10.1371/journal.pone.0190513), 2018-01-02
Supplement: pone.0190513.s001.pdf [file pone.0190513.s001.pdf]

**Supplementary Table S1 : constructs and primers used in this manuscript**

**a. Lentiviral shRNAs**

| Name                      | Based on                                                  | Target              | source/reference     |
|---------------------------|-----------------------------------------------------------|---------------------|----------------------|
| pLKO- SPRYD3 shRNA2 puroR | NM_032840.1-710s21c1                                      | CDS                 | Sigma                |
| pLKO-USP11 shRNA1 puroR   | NM_0046512 1800                                           | CDS                 | Sigma                |
| pLKO-USP11 shRNA5 puroR   | Created with GNM151 + GNM152                              | 3'UTR               |                      |
| pLKO-RAE1 shRNA3 puroR    | NM_003610.3-1572s1c1                                      | 3'UTR               | Sigma                |
| pLKO-PAM shRNA1 puroR     | NM_015057.3-14495s21c1                                    | 3'UTR               | Sigma                |
| pLKO-USP7 shRNA1 puroR    | NM_003470 1249                                            | CDS                 | Sigma/ <sup>1</sup>  |
| pLKO-USP7 shRNA2 puroR    | NM_003470 1648                                            | CDS                 | Sigma/ <sup>1</sup>  |
| pLKO-NuMA shRNA2 puroR    | NM_006185.2-5966s21c1                                     | CDS                 | Sigma                |
| pLKO- ctrl shRNA puroR    | SHC002                                                    | no mammalian target | Sigma/ <sup>1</sup>  |
| pLKO-ctrl shRNA neoR      | SHC002 puroR cassette replaced by neoR                    | no mammalian target | primers : GNM244/245 |
| pLKO-USP11 shRNA1 neoR    | pLKO-USP11 shRNA1 puroR - puroR cassette replaced by neoR | CDS                 | primers : GNM244/245 |
| pLKO-RAE1 shRNA3 neoR     | pLKO-RAE1 shRNA3 puroR - puroR cassette replaced by neoR  | 3'UTR               | primers : GNM244/245 |

## b. Eukaryotic expression plasmids

| Name <sup>§</sup>                   | Description (expression of)          | primers                                    | template                         | destination plasmid        |
|-------------------------------------|--------------------------------------|--------------------------------------------|----------------------------------|----------------------------|
| pQHA-RAE1 puroR                     | HA-tagged RAE1                       | GNM81 + GNM82                              | HeLa cDNA                        | pQHA-puroR <sup>1</sup>    |
| pQFlag-RAE1 puroR                   | Flag-tagged RAE1                     | AgeI/BamHI insert from pQHA-RAE1           | pQHA-RAE1 (this study)           | pQHA-RAE1 (this study)     |
| pQHA-KCTD6 puroR                    | HA-tagged KCTD6                      | GNM84 + GNM85                              | HeLa cDNA                        | pQHA-puroR <sup>1</sup>    |
| pQFlag-KCTD6 puroR                  | Flag-tagged KCTD6                    | AgeI/BamHI insert from pQHA-KCTD6          | pQHA-KCTD6 (this study)          | pQHA-KCTD6 (this study)    |
| pQFlag-USP11sh1R-hygroR             | Flag-USP11 shRNA sh1 resistant       | GNM246+GNM247                              | pQFlag-USP11 puroR               | pQFlag-hygroR <sup>2</sup> |
| pQFlag-RAE1-hygroR                  | Flag-RAE1 shRNA sh3 resistant        | AgeI/BamHI insert from pQFlag-RAE1         |                                  | pQFlag-hygroR <sup>2</sup> |
| pQFlag-BUB3 puroR                   | Flag-tagged BUB3                     | GNM280+GNM281                              | HeLa cDNA                        | pQFlag-puroR <sup>1</sup>  |
| pQFlag-USP11 <sup>WT</sup> puroR    | Flag-USP11 <sup>WT</sup>             |                                            |                                  | 1                          |
| pQHA-USP11 <sup>WT</sup> puroR      | HA-USP11 <sup>WT</sup>               |                                            |                                  | 1                          |
| pQFlag-USP11 <sup>WT</sup> hygroR   | Flag-USP11 <sup>WT</sup>             | GNM243 and GNM26                           | pQFlag-USP11 puroR               | pQFlag-hygroR <sup>2</sup> |
| pQ-USP11 <sup>WT</sup> puroR        | untagged USP11 <sup>WT</sup>         | GNM13 + GNM26                              | pQFlag-USP11 <sup>WT</sup> puroR |                            |
| pQ-USP11 <sup>CS</sup> puroR        | untagged USP11 <sup>CS</sup> (C275S) |                                            | pQFlag-USP11 <sup>CS</sup> puroR |                            |
| pQHis <sub>6</sub> -Ubiquitin puroR | His <sub>6</sub> -ubiquitin          | NotI/EcoRI digest from pMT107 <sup>3</sup> |                                  | pQCXIP (Clontech)          |
| pMT107                              | His <sub>6</sub> -ubiquitin          |                                            |                                  | 3                          |
| pGMFlag-SPRYD3                      | Flag-tagged SPRYD3                   | GNM86 + GNM87                              | HeLa cDNA                        | pGM-Flag <sup>4</sup>      |
| pCG-GagPol                          | retroviral packaging plasmid         |                                            |                                  | 5                          |
| pCG-VsV-G                           | Vesicular stomatitis Virus G         |                                            |                                  | 5                          |
| pCMV-Δ8.2                           | lentiviral packaging plasmid         |                                            |                                  | 6                          |

<sup>§</sup> all pQ named plasmids are based on pQCXIP (Clontech) and are retroviral expression plasmids

### References

- 1 Maertens, G.N., S. El Messaoudi-Aubert, S. Elderkin, K. Hiom, and G. Peters. 2010. Ubiquitin-specific proteases 7 and 11 modulate Polycomb regulation of the INK4a tumour suppressor. *EMBO J.* 29:2553-2565.
- 2 Maertens, G.N., N.J. Cook, W. Wang, S. Hare, S.S. Gupta, I. Oztop, K. Lee, V.E. Pye, O. Cosnefroy, A.P. Snijders, V.N. KewalRamani, A. Fassati, A. Engelman, and P. Cherepanov. 2014. Structural basis for nuclear import of splicing factors by human Transportin 3. *PNAS.* 111:2728-2733.
- 3 Treier, M., L.M. Staszewski, and D. Bohmann. 1994. Ubiquitin-dependent c-Jun degradation in vivo is mediated by the delta domain. *Cell.* 78:787-798.
- 4 Maertens, G.N., P. Cherepanov, and A. Engelman. 2006. Transcriptional co-activator p75 binds and tethers the Myc-interacting protein JPO2 to chromatin. *J Cell Sci.* 119:2563-2571.
- 5 Ulm, J.W., M. Perron, J. Sodroski, and C.M. R. 2007. Complex determinants within the Moloney murine leukemia virus capsid modulate susceptibility of the virus to Fv1 and Ref1-mediated restriction. *Virology.* 363:245-255.
- 6 Naldini, L., U. Blomer, F.H. Gage, D. Trono, and I.M. Verma. 1996. Efficient transfer, integration, and sustained long-term expression of the transgene in adult rat brains injected with a lentiviral vector. *Proc Natl Acad Sci U S A.* 93:11382-11388.

### c. Primer sequences

| Primer        | Sequence 5'-3'                                               | Description                                          |
|---------------|--------------------------------------------------------------|------------------------------------------------------|
| <b>GNM81</b>  | GGCCACCGGTATGAGCCTGTTTGAAC                                   | sense - RAE1 - with AgeI site                        |
| <b>GNM82</b>  | CCGGCTCGAG CTA CTTCTTATTCCTGGGC                              | antisense - RAE1 (with stop codon)- BamHI site       |
| <b>GNM84</b>  | CCGGACCGGTATGGATAATGGAGACTGGG                                | sense - KCTD6 - AgeI site                            |
| <b>GNM85</b>  | GGCCGGATCCTCAGTCGTCTGTCTTCCG                                 | antisense - KCTD6 (with stop codon) - BamHI site     |
| <b>GNM86</b>  | GGCCTGATCAATGAGGAGGACGCGG                                    | sense - SPRYD3 - BclI site                           |
| <b>GNM87</b>  | GGCCGAATTCCTAGCCACTCAAGGGG                                   | antisense - SPRYD3 (with stop codon) - EcoRI site    |
| <b>GNM151</b> | CCGGTCTGAGTTCATGGATGTTAATTCTCGAGAATTAACATCCATGAACTCAGTTTTTTG | sense - USP11 shRNA 5                                |
| <b>GNM152</b> | AATTCAAAAAAGTTCATGGATGTTAATTCTCGAGAATTAACATCCATGAACTCAGA     | antisense - USP11 shRNA 5                            |
| <b>GNM243</b> | GGCCACCGGTATGGCAGTAGCCCCGCGACTG                              | sense - USP11 (start aa1) - AgeI site                |
| <b>GNM246</b> | CCTGCGGGAGCGCACCCCTGCACGGGATTATAATAATTCATACTACGGCCTGATGCTTTT | sense for mutagenesis -USP11 shRNAsh1 resistant      |
| <b>GNM247</b> | CCAAAAAGCATCAGGCCGTAGTATGAATTATTATAATCCCGTGCAGGGGTGCGCTCCCGC | antisense for mutagenesis -USP11 shRNAsh1 res.       |
| <b>GNM280</b> | GGCCCTCGAG ATGACCGGTTCTAACGAGTTCAAGC                         | sense - BUB3 - XhoI site                             |
| <b>GNM281</b> | GGCCGAATTCCTCAAGTACATGGTGACTTGGGTTTTG                        | antisense -BUB3 (with stop codon - EcoRI site        |
| <b>GNM13</b>  | GGCC GAATTC ATGGCAGTAGCCCCGCG                                | sense - untagged USP11 - EcoRI site                  |
| <b>GNM26</b>  | CCGCTCGAGTCAATTAACATCCATGAACTCAGAGC                          | antisense - USP11 with Stop codon - XhoI site        |
| <b>GNM244</b> | CCGG GGATCC ATGATTGAACAAGATGGATTGCACG                        | sense neomycin resistance cassette - BamHI site      |
| <b>GNM245</b> | GGCC GGTACC TCAGAAGAACTCGTCAAGAAGGCG                         | antisense neomycin resistance cassette - stop - KpnI |
